# Supplementary material
Source: publisher figshare collection journal article supplement (https://sage.figshare.com/ndownloader/files/23166629)
Supplement: Supplementary file 1 [file 23166629]

APPENDIX

**Table A1.** Distribution of Universities by Country (Sample for Regression Models)

| Country | *N* of Universities | % of Universities |
| --- | --- | --- |
| Botswana | 1 | 0.01 |
| Central African Republic | 1 | 0.01 |
| Congo (Republic of the) | 1 | 0.01 |
| Lesotho | 1 | 0.01 |
| Luxembourg | 1 | 0.01 |
| Qatar | 1 | 0.01 |
| Burkina Faso | 3 | 0.03 |
| Guyana | 3 | 0.03 |
| Mali | 3 | 0.03 |
| Namibia | 3 | 0.03 |
| Mauritius | 4 | 0.04 |
| Lao People’s Democratic Republic | 5 | 0.05 |
| Burundi | 6 | 0.06 |
| Niger | 7 | 0.07 |
| Singapore | 7 | 0.07 |
| Turkmenistan | 9 | 0.09 |
| Estonia | 10 | 0.1 |
| Bahrain | 11 | 0.11 |
| Cameroon | 11 | 0.11 |
| Guinea | 11 | 0.11 |
| Honduras | 11 | 0.11 |
| Zimbabwe | 11 | 0.11 |
| Oman | 12 | 0.12 |
| Serbia | 12 | 0.12 |
| Albania | 13 | 0.13 |
| Benin | 14 | 0.14 |
| Côte d’Ivoire | 14 | 0.14 |
| Mongolia | 14 | 0.14 |
| Slovenia | 14 | 0.14 |
| Tajikistan | 14 | 0.14 |
| Algeria | 15 | 0.15 |
| Madagascar | 15 | 0.15 |
| Rwanda | 15 | 0.15 |
| Sri Lanka | 16 | 0.16 |
| Cyprus | 17 | 0.17 |
| El Salvador | 17 | 0.17 |
| Ireland | 17 | 0.17 |
| Lithuania | 17 | 0.17 |
| Macedonia | 17 | 0.17 |
| Croatia | 18 | 0.18 |
| Moldova | 19 | 0.19 |
| New Zealand | 19 | 0.19 |
| Slovak Republic | 23 | 0.23 |
| Denmark | 25 | 0.25 |
| Latvia | 25 | 0.25 |
| Jordan | 26 | 0.26 |
| Azerbaijan | 27 | 0.27 |
| Lebanon | 27 | 0.27 |
| Armenia | 29 | 0.29 |
| Bulgaria | 29 | 0.29 |
| Dominican Republic | 29 | 0.29 |
| Mozambique | 30 | 0.30 |
| Switzerland | 30 | 0.30 |
| Senegal | 31 | 0.31 |
| Tunisia | 31 | 0.31 |
| Georgia | 32 | 0.32 |
| Israel | 33 | 0.33 |
| Norway | 33 | 0.33 |
| South Africa | 33 | 0.33 |
| Kenya | 34 | 0.34 |
| Vietnam | 34 | 0.34 |
| Congo (Democratic Republic of the) | 35 | 0.35 |
| Greece | 35 | 0.35 |
| Saudi Arabia | 35 | 0.35 |
| Finland | 36 | 0.36 |
| Sweden | 38 | 0.38 |
| Costa Rica | 41 | 0.41 |
| Hungary | 42 | 0.42 |
| Ecuador | 44 | 0.44 |
| Netherlands | 44 | 0.44 |
| Belarus | 45 | 0.45 |
| Malaysia | 47 | 0.47 |
| Portugal | 47 | 0.47 |
| Czech Republic | 48 | 0.48 |
| Myanmar | 48 | 0.48 |
| Belgium | 49 | 0.49 |
| Austria | 50 | 0.50 |
| Australia | 53 | 0.53 |
| Romania | 54 | 0.54 |
| Chile | 55 | 0.55 |
| Ghana | 55 | 0.55 |
| Uzbekistan | 55 | 0.55 |
| Morocco | 64 | 0.64 |
| Egypt | 72 | 0.72 |
| Argentina | 76 | 0.76 |
| Spain | 78 | 0.78 |
| Italy | 85 | 0.85 |
| Kazakhstan | 90 | 0.90 |
| Thailand | 92 | 0.92 |
| Iran (Islamic Republic of) | 93 | 0.93 |
| Canada | 120 | 1.20 |
| Colombia | 127 | 1.27 |
| Turkey | 141 | 1.42 |
| United Kingdom | 150 | 1.51 |
| Ukraine | 167 | 1.68 |
| Korea (Republic of) | 187 | 1.88 |
| Poland | 204 | 2.05 |
| France | 263 | 2.64 |
| Brazil | 279 | 2.80 |
| Germany | 347 | 3.48 |
| India | 457 | 4.59 |
| Russian Federation | 499 | 5.01 |
| Indonesia | 515 | 5.17 |
| Mexico | 654 | 6.56 |
| Japan | 683 | 6.86 |
| China | 709 | 7.12 |
| United States of America | 1,864 | 18.71 |
| Total | 9,963 | 100 |

**Table A2.** Means of Dependent Variables by Country (Sorted by Overall Internationalization; Sample for Regression Models)

| Country | Overall Internationalization | Interstate Variant | Regional Variant | Global Variant |
| --- | --- | --- | --- | --- |
| Mali | 0.00 | 0.00 | 0.00 | 0.00 |
| Niger | 0.00 | 0.00 | 0.00 | 0.00 |
| Singapore | 0.00 | 0.00 | 0.00 | 0.00 |
| Sri Lanka | 0.06 | 0.00 | 0.00 | 0.06 |
| Myanmar | 0.10 | 0.06 | 0.02 | 0.04 |
| Iran (Islamic Republic of) | 0.13 | 0.05 | 0.05 | 0.06 |
| Uzbekistan | 0.13 | 0.07 | 0.07 | 0.00 |
| Israel | 0.15 | 0.12 | 0.03 | 0.03 |
| Ghana | 0.16 | 0.05 | 0.02 | 0.15 |
| Burundi | 0.17 | 0.00 | 0.17 | 0.00 |
| Saudi Arabia | 0.17 | 0.03 | 0.06 | 0.14 |
| Bahrain | 0.18 | 0.18 | 0.00 | 0.00 |
| Belgium | 0.18 | 0.10 | 0.04 | 0.08 |
| Guinea | 0.18 | 0.09 | 0.00 | 0.09 |
| Congo (Democratic Republic of the) | 0.20 | 0.17 | 0.03 | 0.06 |
| Denmark | 0.20 | 0.12 | 0.04 | 0.08 |
| Dominican Republic | 0.21 | 0.17 | 0.00 | 0.03 |
| Croatia | 0.22 | 0.22 | 0.00 | 0.06 |
| Egypt | 0.24 | 0.21 | 0.04 | 0.04 |
| Mauritius | 0.25 | 0.25 | 0.00 | 0.00 |
| Belarus | 0.27 | 0.24 | 0.07 | 0.02 |
| Costa Rica | 0.27 | 0.24 | 0.02 | 0.05 |
| Madagascar | 0.27 | 0.07 | 0.00 | 0.27 |
| Romania | 0.28 | 0.28 | 0.02 | 0.00 |
| Cyprus | 0.29 | 0.24 | 0.00 | 0.06 |
| Germany | 0.29 | 0.22 | 0.05 | 0.07 |
| Ireland | 0.29 | 0.29 | 0.00 | 0.06 |
| Lebanon | 0.30 | 0.30 | 0.07 | 0.07 |
| Poland | 0.30 | 0.24 | 0.07 | 0.07 |
| Albania | 0.31 | 0.15 | 0.08 | 0.08 |
| Russian Federation | 0.31 | 0.23 | 0.15 | 0.02 |
| Tunisia | 0.32 | 0.29 | 0.00 | 0.03 |
| Burkina Faso | 0.33 | 0.00 | 0.00 | 0.33 |
| Czech Republic | 0.33 | 0.25 | 0.17 | 0.19 |
| Guyana | 0.33 | 0.33 | 0.00 | 0.00 |
| Mexico | 0.33 | 0.24 | 0.04 | 0.08 |
| Namibia | 0.33 | 0.33 | 0.33 | 0.00 |
| Oman | 0.33 | 0.25 | 0.00 | 0.08 |
| Turkmenistan | 0.33 | 0.22 | 0.00 | 0.11 |
| Ukraine | 0.33 | 0.27 | 0.09 | 0.03 |
| Austria | 0.34 | 0.28 | 0.12 | 0.08 |
| Sweden | 0.34 | 0.29 | 0.00 | 0.21 |
| El Salvador | 0.35 | 0.24 | 0.18 | 0.06 |
| India | 0.35 | 0.21 | 0.08 | 0.17 |
| Jordan | 0.35 | 0.15 | 0.08 | 0.15 |
| Vietnam | 0.35 | 0.32 | 0.06 | 0.06 |
| Benin | 0.36 | 0.21 | 0.14 | 0.07 |
| France | 0.36 | 0.24 | 0.07 | 0.16 |
| Morocco | 0.36 | 0.23 | 0.03 | 0.14 |
| Norway | 0.36 | 0.33 | 0.03 | 0.12 |
| Brazil | 0.37 | 0.31 | 0.05 | 0.06 |
| Greece | 0.37 | 0.20 | 0.14 | 0.06 |
| Mozambique | 0.37 | 0.23 | 0.10 | 0.20 |
| New Zealand | 0.37 | 0.37 | 0.26 | 0.11 |
| United States of America | 0.37 | 0.27 | 0.08 | 0.13 |
| Argentina | 0.39 | 0.36 | 0.00 | 0.05 |
| Indonesia | 0.39 | 0.13 | 0.21 | 0.19 |
| Kazakhstan | 0.39 | 0.29 | 0.20 | 0.02 |
| Estonia | 0.40 | 0.40 | 0.00 | 0.00 |
| Lao People’s Democratic Republic | 0.40 | 0.20 | 0.20 | 0.20 |
| Bulgaria | 0.41 | 0.34 | 0.24 | 0.00 |
| Serbia | 0.42 | 0.42 | 0.00 | 0.00 |
| Georgia | 0.44 | 0.44 | 0.03 | 0.00 |
| Italy | 0.44 | 0.34 | 0.09 | 0.16 |
| Japan | 0.44 | 0.36 | 0.20 | 0.14 |
| United Kingdom | 0.44 | 0.31 | 0.08 | 0.19 |
| Cameroon | 0.45 | 0.18 | 0.18 | 0.36 |
| Chile | 0.45 | 0.36 | 0.18 | 0.15 |
| Zimbabwe | 0.45 | 0.18 | 0.00 | 0.45 |
| Algeria | 0.47 | 0.00 | 0.07 | 0.47 |
| Switzerland | 0.47 | 0.37 | 0.13 | 0.30 |
| Armenia | 0.48 | 0.38 | 0.21 | 0.00 |
| Hungary | 0.48 | 0.45 | 0.14 | 0.07 |
| Senegal | 0.48 | 0.42 | 0.06 | 0.10 |
| China | 0.49 | 0.41 | 0.14 | 0.05 |
| Portugal | 0.49 | 0.28 | 0.32 | 0.21 |
| Spain | 0.49 | 0.27 | 0.24 | 0.10 |
| Finland | 0.50 | 0.47 | 0.08 | 0.00 |
| Slovenia | 0.50 | 0.36 | 0.14 | 0.14 |
| Tajikistan | 0.50 | 0.50 | 0.07 | 0.00 |
| Latvia | 0.52 | 0.40 | 0.16 | 0.08 |
| Slovak Republic | 0.52 | 0.35 | 0.35 | 0.22 |
| Thailand | 0.52 | 0.32 | 0.20 | 0.29 |
| Moldova | 0.53 | 0.47 | 0.05 | 0.00 |
| Australia | 0.55 | 0.49 | 0.23 | 0.28 |
| Honduras | 0.55 | 0.36 | 0.18 | 0.27 |
| Azerbaijan | 0.56 | 0.41 | 0.26 | 0.04 |
| Côte d’Ivoire | 0.57 | 0.29 | 0.07 | 0.29 |
| Malaysia | 0.57 | 0.40 | 0.17 | 0.23 |
| Mongolia | 0.57 | 0.50 | 0.21 | 0.07 |
| Netherlands | 0.57 | 0.43 | 0.07 | 0.20 |
| Lithuania | 0.59 | 0.47 | 0.24 | 0.00 |
| Macedonia | 0.59 | 0.59 | 0.29 | 0.12 |
| Rwanda | 0.60 | 0.13 | 0.07 | 0.47 |
| Ecuador | 0.61 | 0.55 | 0.02 | 0.14 |
| South Africa | 0.61 | 0.21 | 0.42 | 0.45 |
| Kenya | 0.71 | 0.32 | 0.12 | 0.62 |
| Canada | 0.72 | 0.56 | 0.34 | 0.44 |
| Colombia | 0.72 | 0.61 | 0.24 | 0.09 |
| Korea (Republic of) | 0.73 | 0.61 | 0.48 | 0.17 |
| Turkey | 0.74 | 0.66 | 0.38 | 0.02 |
| Botswana | 1.00 | 1.00 | 1.00 | 1.00 |
| Central African Republic | 1.00 | 1.00 | 0.00 | 1.00 |
| Congo (Republic of the) | 1.00 | 1.00 | 0.00 | 1.00 |
| Lesotho | 1.00 | 0.00 | 0.00 | 1.00 |
| Qatar | 1.00 | 1.00 | 0.00 | 1.00 |

**Table A3.** Disciplinary and Subdisciplinary Coding (Selected Subdisciplines)

| Arts & Humanities | Science, Technology, Engineering, & Mathematics | Social Sciences |
| --- | --- | --- |
| Languages | Chemistry | Economics |
| History | Physics | Psychology |
| Fine arts | Biology | Political sciences |
| Literature | Natural sciences | Social studies |
| Philosophy | Biological and life sciences | Communication studies |
| Modern languages | Agriculture | Sociology |
| Linguistics | Technology | Cultural studies |
| Design | Mechanical engineering | Business |
| Graphic design | Computer engineering | Education |
| Visual arts | Civil engineering | Anthropology |
| Art history | Environmental engineering | Information science |
| Performing arts | Health | Development studies |

*Note:* We provide only a selection of subdisciplines, as the full array of comprises more than 1,300 fields of study.

ROBUSTNESS CHECKS

Tables A4 through A7 report on a series of robustness analyses for each of our four dependent variables. We estimate (1) a model without the student mobility measure and (2) one without the economic globalization measure, given high correlations among these economic predictors. We run (3) a model without international nongovernmental organizations (INGOs), given the variable’s moderate correlation (0.41) with the economic globalization measure. We run (4) a model that includes variables for gross domestic product per capita (logged) and level of democracy instead of the economic globalization and INGO variables to justify our omission of these as controls (they are not significant). We run (5) a model without our regional controls, given high correlations of some regional variables with predictors. We run (6) a model without the disciplinary predictors, as they explain much variation. However, we argue that disciplinary groups do not represent international frames per se. Relatedly, it could be argued that collectively our disciplinary predictors capture a university’s program capacity; we thus report on (7) a model without our alternative capacity measure (student enrollment). The mean for our business variable is extremely small (0.02); we thus also run (8) a model without this predictor. As discussed, the sample for our main regression analyses is substantially smaller than the full WHED data set due to missing data on key covariates. We thus also run (9) a model without the two independent variables with the most missing values (student mobility and student enrollment) to preserve sample size. We run (10) a model without the United States, due to its unusually large number of universities. Findings from all these robustness checks are highly consistent with the findings from our models presented in Tables 6 and 7 in the main text.

**Table A4.** Robustness Checks: Overall Internationalization (Odds Ratios)

| Variables | Without Mobility | Without KOF | Without INGOs | GDP & Polity | Without Regions | Without Disciplines | Without Students *N* | Without Business | Larger Sample | Without the United States |
| --- | --- | --- | --- | --- | --- | --- | --- | --- | --- | --- |
| *Economic Factors* |  |  |  |  |  |  |  |  |  |  |
| International student mobility rate (log) |  | 0.787 | 0.774 | 0.859 | 0.667** | 0.987 | 0.769 | 0.770 |  | 0.767 |
|  | (0.121) | (0.140) | (0.151) | (0.101) | (0.185) | (0.139) | (0.140) |  | (0.139) |
| KOF economic globalization | 0.996 |  | 1.002 |  | 1.007 | 1.013 | 1.002 | 1.002 | 0.997 | 1.001 |
| (0.006) |  | (0.007) |  | (0.006) | (0.008) | (0.007) | (0.007) | (0.004) | (0.007) |
| Business school | 2.240*** | 2.241*** | 2.232*** | 2.231*** | 2.214*** | 2.036*** | 2.243*** |  | 1.446* | 1.951*** |
| (0.431) | (0.431) | (0.430) | (0.429) | (0.426) | (0.327) | (0.432) |  | (0.208) | (0.388) |
| *Organizational Receptiveness* |  |  |  |  |  |  |  |  |  |  |
| International office | 1.514*** | 1.517*** | 1.515*** | 1.514*** | 1.518*** | 1.917*** | 1.524*** | 1.523*** | 1.431*** | 1.412*** |
| (0.115) | (0.116) | (0.115) | (0.115) | (0.116) | (0.123) | (0.116) | (0.116) | (0.099) | (0.121) |
| *N* of social sciences programs (log) | 88.747*** | 89.202*** | 88.882*** | 89.190*** | 89.227*** |  | 90.550*** | 92.483*** | 80.421*** | 102.544*** |
| (11.067) | (11.123) | (11.085) | (11.121) | (11.106) |  | (11.183) | (11.506) | (7.953) | (13.989) |
| *N* of science programs (log) | 0.812** | 0.810** | 0.809** | 0.810** | 0.809** |  | 0.820** | 0.761*** | 0.724*** | 0.732*** |
| (0.061) | (0.061) | (0.061) | (0.061) | (0.061) |  | (0.061) | (0.056) | (0.044) | (0.058) |
| *N* of humanities programs (log) | 1.088 | 1.089 | 1.091 | 1.092 | 1.087 |  | 1.092 | 1.056 | 1.371*** | 1.013 |
| (0.089) | (0.089) | (0.089) | (0.089) | (0.088) |  | (0.089) | (0.085) | (0.094) | (0.089) |
| *Structural Embeddedness* |  |  |  |  |  |  |  |  |  |  |
| University association membership | 1.382*** | 1.386*** | 1.388*** | 1.384*** | 1.366*** | 2.264*** | 1.393*** | 1.365*** | 1.373*** | 1.385*** |
| (0.116) | (0.116) | (0.117) | (0.116) | (0.114) | (0.162) | (0.117) | (0.114) | (0.098) | (0.120) |
| INGO memberships (log) | 0.747 | 0.743 |  |  | 0.834 | 0.949 | 0.747 | 0.755 | 0.764 | 0.760 |
| (0.206) | (0.204) |  |  | (0.184) | (0.270) | (0.205) | (0.207) | (0.157) | (0.208) |
| *University-Level Controls* |  |  |  |  |  |  |  |  |  |  |
| *N* of students (log) | 1.047 | 1.046 | 1.045 | 1.045 | 1.046 | 2.099*** |  | 1.047 |  | 1.025 |
| (0.054) | (0.054) | (0.054) | (0.054) | (0.054) | (0.087) |  | (0.054) |  | (0.058) |
| Public institution | 0.907 | 0.906 | 0.907 | 0.906 | 0.907 | 0.897* | 0.913 | 0.938 | 0.903 | 0.968 |
| (0.059) | (0.059) | (0.059) | (0.059) | (0.059) | (0.049) | (0.059) | (0.061) | (0.049) | (0.074) |
| Age (log) | 0.940 | 0.942 | 0.941 | 0.941 | 0.959 | 1.457*** | 0.947 | 0.943 | 0.952 | 0.925 |
| (0.087) | (0.088) | (0.088) | (0.088) | (0.089) | (0.111) | (0.088) | (0.088) | (0.074) | (0.093) |
| *Regional Controls (ref: Western Europe)* |  |  |  |  |  |  |  |  |  |  |
| North America | 0.864 | 0.872 | 0.900 | 0.917 |  | 3.153* | 0.875 | 0.885 | 0.901 | 1.276 |
| (0.371) | (0.366) | (0.383) | (0.385) |  | (1.456) | (0.372) | (0.379) | (0.392) | (0.777) |
| Sub-Saharan Africa | 0.716 | 0.702 | 0.928 | 0.630 |  | 2.043 | 0.730 | 0.760 | 0.886 | 0.710 |
| (0.290) | (0.246) | (0.314) | (0.273) |  | (0.839) | (0.294) | (0.306) | (0.263) | (0.285) |
| Asia | 1.112 | 0.946 | 1.170 | 1.011 |  | 2.059* | 0.963 | 0.964 | 1.059 | 0.963 |
| (0.366) | (0.314) | (0.340) | (0.321) |  | (0.734) | (0.330) | (0.331) | (0.274) | (0.329) |
| Eastern Europe | 1.014 | 0.972 | 1.090 | 0.933 |  | 1.313 | 0.980 | 0.984 | 1.056 | 0.975 |
| (0.254) | (0.241) | (0.250) | (0.250) |  | (0.340) | (0.245) | (0.246) | (0.243) | (0.243) |
| Middle East and North Africa | 0.614 | 0.599 | 0.727 | 0.608 |  | 1.005 | 0.622 | 0.636 | 0.602 | 0.625 |
| (0.210) | (0.185) | (0.222) | (0.207) |  | (0.352) | (0.211) | (0.216) | (0.165) | (0.212) |
| Latin America | 1.233 | 1.049 | 1.224 | 1.105 |  | 2.144* | 1.087 | 1.086 | 0.968 | 1.067 |
| (0.423) | (0.352) | (0.408) | (0.356) |  | (0.790) | (0.385) | (0.386) | (0.250) | (0.378) |
| Australasia | 0.680 | 0.771 | 0.832 | 0.799 |  | 1.186 | 0.799 | 0.797 | 0.906 | 0.814 |
| (0.356) | (0.398) | (0.440) | (0.411) |  | (0.647) | (0.424) | (0.424) | (0.432) | (0.430) |
| *Alternative Variables* |  |  |  |  |  |  |  |  |  |  |
| GDP per capita (log) |  |  |  | 0.779 |  |  |  |  |  |  |
|  |  |  | (0.194) |  |  |  |  |  |  |
| Level of democracy |  |  |  | 0.999 |  |  |  |  |  |  |
|  |  |  | (0.016) |  |  |  |  |  |  |
| Constant | −3.670** | −3.767*** | −4.917*** | −3.737*** | −4.677*** | −5.237*** | −3.762*** | 3.917*** | −3.579*** | −3.850*** |
| (1.135) | (1.011) | (0.605) | (1.090) | (0.668) | (1.156) | (1.127) | (1.137) | (0.755) | (1.135) |
| Variance of the constant | 0.264*** | 0.258*** | 0.258*** | 0.258*** | 0.276*** | 0.332*** | 0.258*** | 0.261*** | 0.297*** | 0.256*** |
| (0.064) | (0.063) | (0.064) | (0.063) | (0.067) | (0.072) | (0.063) | (0.063) | (0.058) | (0.063) |
| Observations | 9,963 | 9,963 | 9,963 | 9,963 | 9,963 | 9,963 | 9,963 | 9,963 | 15,706 | 8,099 |

*Note:* Exponentiated coefficients reported. Standard errors in parentheses. GDP = gross domestic product; INGO = international nongovernmental organization.

*** *p* < .001. ** *p* < .01. * *p* < .05.

**Table A5.** Robustness Checks: Interstate Variant (Odds Ratios)

| Variables | Without Mobility | Without KOF | Without INGOs | GDP & Polity | Without Regions | Without Disciplines | Without Students *N* | Without Business | Larger Sample | Without the United States |
| --- | --- | --- | --- | --- | --- | --- | --- | --- | --- | --- |
| *Economic Factors* |  |  |  |  |  |  |  |  |  |  |
| International student mobility rate (log) |  | 0.951 | 1.025 | 1.092 | 0.738 | 1.224 | 1.012 | 1.009 |  | 1.022 |
|  | (0.169) | (0.214) | (0.217) | (0.139) | (0.238) | (0.210) | (0.209) |  | (0.212) |
| KOF Globalization Index | 0.995 |  | 0.995 |  | 1.014 | 1.008 | 0.995 | 0.996 | 0.999 | 0.995 |
| (0.007) |  | (0.009) |  | (0.008) | (0.008) | (0.008) | (0.008) | (0.005) | (0.008) |
| Business school | 3.763*** | 3.756*** | 3.746*** | 3.741*** | 3.654*** | 3.205*** | 3.766*** |  | 2.513*** | 3.254*** |
| (0.738) | (0.737) | (0.734) | (0.734) | (0.717) | (0.531) | (0.740) |  | (0.377) | (0.660) |
| *Organizational Receptiveness* |  |  |  |  |  |  |  |  |  |  |
| International office | 1.539*** | 1.539*** | 1.537*** | 1.536*** | 1.544*** | 1.962*** | 1.553*** | 1.549*** | 1.536*** | 1.588*** |
| (0.115) | (0.115) | (0.115) | (0.115) | (0.116) | (0.128) | (0.116) | (0.116) | (0.106) | (0.134) |
| *N* of social sciences programs (log) | 87.640*** | 87.409*** | 87.354*** | 87.524*** | 86.332*** |  | 90.236*** | 91.863*** | 84.350*** | 100.316*** |
| (11.851) | (11.817) | (11.812) | (11.830) | (11.667) |  | (12.120) | (12.369) | (9.500) | (14.795) |
| *N* of science programs (log) | 0.654*** | 0.654*** | 0.652*** | 0.654*** | 0.654*** |  | 0.671*** | 0.591*** | 0.662*** | 0.605*** |
| (0.052) | (0.052) | (0.052) | (0.052) | (0.052) |  | (0.053) | (0.046) | (0.045) | (0.051) |
| *N* of humanities programs (log) | 1.046 | 1.046 | 1.048 | 1.049 | 1.053 |  | 1.052 | 0.996 | 1.111 | 0.914 |
| (0.090) | (0.090) | (0.090) | (0.091) | (0.091) |  | (0.091) | (0.085) | (0.083) | (0.085) |
| *Structural Embeddedness* |  |  |  |  |  |  |  |  |  |  |
| University association membership | 1.304** | 1.305** | 1.306** | 1.305** | 1.274** | 2.015*** | 1.317** | 1.268** | 1.341*** | 1.294** |
| (0.112) | (0.112) | (0.112) | (0.112) | (0.109) | (0.150) | (0.113) | (0.108) | (0.100) | (0.116) |
| INGO memberships (log) | 0.596 | 0.595 |  |  | 0.954 | 0.772 | 0.604 | 0.612 | 0.569* | 0.604 |
| (0.186) | (0.186) |  |  | (0.262) | (0.226) | (0.189) | (0.191) | (0.151) | (0.189) |
| *University-Level Controls* |  |  |  |  |  |  |  |  |  |  |
| *N* of students (log) | 1.103 | 1.103 | 1.100 | 1.099 | 1.107 | 2.057*** |  | 1.101 |  | 1.104 |
| (0.060) | (0.060) | (0.060) | (0.060) | (0.060) | (0.092) |  | (0.060) |  | (0.066) |
| Public institution | 0.519*** | 0.520*** | 0.519*** | 0.518*** | 0.518*** | 0.568*** | 0.527*** | 0.552*** | 0.530*** | 0.566*** |
| (0.036) | (0.036) | (0.036) | (0.036) | (0.036) | (0.033) | (0.036) | (0.038) | (0.032) | (0.046) |
| Age (log) | 0.788* | 0.788* | 0.786* | 0.787* | 0.807* | 1.249** | 0.795* | 0.791* | 0.790** | 0.730** |
| (0.077) | (0.077) | (0.077) | (0.077) | (0.079) | (0.101) | (0.078) | (0.077) | (0.068) | (0.077) |
| *Regional Controls (ref.: Western Europe)* |  |  |  |  |  |  |  |  |  |  |
| North America | 0.687 | 0.726 | 0.704 | 0.782 |  | 2.484 | 0.667 | 0.687 | 0.930 | 0.816 |
| (0.336) | (0.350) | (0.348) | (0.373) |  | (1.155) | (0.327) | (0.336) | (0.558) | (0.557) |
| Sub-Saharan Africa | 0.226** | 0.260*** | 0.339** | 0.225** |  | 0.805 | 0.226** | 0.245** | 0.317** | 0.221** |
| (0.104) | (0.105) | (0.133) | (0.110) |  | (0.345) | (0.104) | (0.112) | (0.120) | (0.102) |
| Asia | 0.717 | 0.769 | 1.021 | 0.797 |  | 1.651 | 0.727 | 0.726 | 0.661 | 0.736 |
| (0.267) | (0.291) | (0.340) | (0.287) |  | (0.602) | (0.284) | (0.282) | (0.221) | (0.288) |
| Eastern Europe | 1.049 | 1.076 | 1.270 | 1.015 |  | 1.394 | 1.056 | 1.059 | 1.088 | 1.048 |
| (0.295) | (0.302) | (0.332) | (0.306) |  | (0.368) | (0.299) | (0.299) | (0.327) | (0.297) |
| Middle East and North Africa | 0.397* | 0.438* | 0.526 | 0.392* |  | 0.689 | 0.405* | 0.422* | 0.456* | 0.402* |
| (0.154) | (0.155) | (0.185) | (0.153) |  | (0.251) | (0.157) | (0.163) | (0.161) | (0.156) |
| Latin America | 0.980 | 1.073 | 1.250 | 1.188 |  | 1.990 | 1.018 | 1.013 | 0.766 | 1.002 |
| (0.381) | (0.413) | (0.479) | (0.434) |  | (0.753) | (0.413) | (0.410) | (0.254) | (0.407) |
| Australasia | 1.117 | 1.207 | 1.206 | 1.286 |  | 1.477 | 1.131 | 1.128 | 0.807 | 1.120 |
| (0.639) | (0.687) | (0.708) | (0.722) |  | (0.808) | (0.662) | (0.660) | (0.484) | (0.656) |
| *Alternative Variables* |  |  |  |  |  |  |  |  |  |  |
| GDP per capita (log) |  |  |  | 0.699 |  |  |  |  |  |  |
|  |  |  | (0.196) |  |  |  |  |  |  |
| Level of democracy |  |  |  | 0.984 |  |  |  |  |  |  |
|  |  |  | (0.018) |  |  |  |  |  |  |
| Constant | −2.695* | −3.047** | −4.495*** | −3.181** | −5.653*** | −4.107*** | −2.445 | −2.756* | −2.533** | −2.645* |
| (1.279) | (1.150) | (0.688) | (1.228) | (0.821) | (1.198) | (1.282) | (1.283) | (0.951) | (1.290) |
| Variance of the constant | 0.363*** | 0.366*** | 0.371*** | 0.354*** | 0.496** | 0.337*** | 0.364*** | 0.363*** | 0.626** | 0.365*** |
| (0.081) | (0.081) | (0.083) | (0.080) | (0.107) | (0.074) | (0.081) | (0.081) | (0.103) | (0.082) |
| Observations | 9,963 | 9,963 | 9,963 | 9,963 | 9,963 | 9,963 | 9,963 | 9,963 | 15,706 | 8,099 |

*Note:* Exponentiated coefficients reported. Standard errors in parentheses. GDP = gross domestic product; INGO = international nongovernmental organization.

*** *p* < .001. ** *p* < .01. * *p* < .05.

**Table A6.** Robustness Checks: Regional Variant (Odds Ratios)

| Variables | Without Mobility | Without KOF | Without INGOs | GDP & Polity | Without Regions | Without Disciplines | Without Students *N* | Without Business | Larger Sample | Without the United States |
| --- | --- | --- | --- | --- | --- | --- | --- | --- | --- | --- |
| *Economic Factors* |  |  |  |  |  |  |  |  |  |  |
| International student mobility rate (log) |  | 0.913 | 0.745 | 0.811 | 0.623* | 0.873 | 0.746 | 0.744 |  | 0.745 |
|  | (0.195) | (0.186) | (0.198) | (0.133) | (0.258) | (0.187) | (0.186) |  | (0.191) |
| KOF Globalization Index | 1.009 |  | 1.015 |  | 1.017 | 1.026* | 1.015 | 1.015 | 1.001 | 1.016 |
| (0.009) |  | (0.011) |  | (0.009) | (0.013) | (0.011) | (0.011) | (0.006) | (0.011) |
| Business school | 0.308* | 0.312* | 0.309* | 0.311* | 0.303* | 0.395* | 0.308* |  | 0.245*** | 0.313* |
| (0.153) | (0.155) | (0.154) | (0.155) | (0.151) | (0.184) | (0.153) |  | (0.097) | (0.156) |
| *Organizational Receptiveness* |  |  |  |  |  |  |  |  |  |  |
| International office | 1.032 | 1.033 | 1.034 | 1.034 | 1.045 | 1.417*** | 1.035 | 1.031 | 0.955 | 1.019 |
| (0.094) | (0.094) | (0.094) | (0.094) | (0.095) | (0.119) | (0.094) | (0.093) | (0.081) | (0.101) |
| *N* of social sciences programs (log) | 30.733*** | 31.100*** | 30.813*** | 31.000*** | 31.040*** |  | 31.018*** | 29.085*** | 30.639*** | 28.719*** |
| (5.266) | (5.328) | (5.278) | (5.310) | (5.311) |  | (5.251) | (4.927) | (4.212) | (5.156) |
| *N* of science programs (log) | 0.963 | 0.960 | 0.962 | 0.959 | 0.957 |  | 0.967 | 1.006 | 0.715*** | 0.937 |
| (0.102) | (0.102) | (0.102) | (0.102) | (0.102) |  | (0.101) | (0.106) | (0.061) | (0.103) |
| *N* of humanities programs (log) | 1.498*** | 1.497*** | 1.501*** | 1.494*** | 1.522*** |  | 1.504*** | 1.538*** | 2.214*** | 1.646*** |
| (0.173) | (0.173) | (0.174) | (0.173) | (0.176) |  | (0.174) | (0.178) | (0.219) | (0.199) |
| *Structural Embeddedness* |  |  |  |  |  |  |  |  |  |  |
| University association membership | 1.315* | 1.320* | 1.316* | 1.322** | 1.271* | 2.104*** | 1.319** | 1.328** | 1.195 | 1.325* |
| (0.142) | (0.142) | (0.142) | (0.143) | (0.136) | (0.212) | (0.142) | (0.143) | (0.114) | (0.148) |
| INGO memberships (log) | 1.099 | 1.103 |  |  | 0.697 | 1.493 | 1.081 | 1.073 | 1.454 | 1.102 |
| (0.413) | (0.419) |  |  | (0.218) | (0.658) | (0.402) | (0.400) | (0.475) | (0.419) |
| *University-Level Controls* |  |  |  |  |  |  |  |  |  |  |
| *N* of students (log) | 1.023 | 1.022 | 1.022 | 1.022 | 1.016 | 2.207*** |  | 1.027 |  | 1.015 |
| (0.080) | (0.080) | (0.080) | (0.080) | (0.079) | (0.149) |  | (0.080) |  | (0.087) |
| Public institution | 1.699*** | 1.691*** | 1.696*** | 1.692*** | 1.716*** | 1.803*** | 1.703*** | 1.665*** | 1.627*** | 1.874*** |
| (0.161) | (0.160) | (0.160) | (0.160) | (0.161) | (0.156) | (0.159) | (0.156) | (0.128) | (0.206) |
| Age (log) | 1.009 | 1.008 | 1.013 | 1.008 | 1.022 | 1.670*** | 1.015 | 1.015 | 1.112 | 0.954 |
| (0.132) | (0.132) | (0.133) | (0.132) | (0.133) | (0.194) | (0.133) | (0.133) | (0.121) | (0.132) |
| *Regional Controls (ref.: Western Europe)* |  |  |  |  |  |  |  |  |  |  |
| North America | 1.263 | 1.132 | 1.298 | 1.069 |  | 5.602* | 1.297 | 1.328 | 1.083 | 1.442 |
| (0.684) | (0.612) | (0.690) | (0.567) |  | (3.771) | (0.692) | (0.710) | (0.684) | (1.083) |
| Sub-Saharan Africa | 1.727 | 1.228 | 1.660 | 1.718 |  | 5.055* | 1.755 | 1.714 | 1.695 | 1.832 |
| (0.945) | (0.602) | (0.766) | (0.988) |  | (3.186) | (0.950) | (0.930) | (0.813) | (1.011) |
| Asia | 3.756** | 2.798* | 3.060** | 3.036** |  | 7.471*** | 3.215** | 3.237** | 3.349** | 3.320** |
| (1.642) | (1.264) | (1.158) | (1.265) |  | (3.994) | (1.451) | (1.464) | (1.352) | (1.533) |
| Eastern Europe | 1.964* | 1.794 | 1.839* | 2.072* |  | 2.513* | 1.889 | 1.869 | 2.117* | 1.906 |
| (0.660) | (0.608) | (0.560) | (0.740) |  | (0.992) | (0.629) | (0.623) | (0.751) | (0.649) |
| Middle East and North Africa | 1.203 | 0.913 | 1.177 | 1.033 |  | 2.012 | 1.228 | 1.213 | 1.251 | 1.234 |
| (0.574) | (0.401) | (0.508) | (0.494) |  | (1.111) | (0.579) | (0.574) | (0.557) | (0.594) |
| Latin America | 1.835 | 1.275 | 1.478 | 1.326 |  | 2.889 | 1.534 | 1.521 | 1.780 | 1.631 |
| (0.859) | (0.615) | (0.680) | (0.601) |  | (1.648) | (0.749) | (0.744) | (0.745) | (0.815) |
| Australasia | 2.583 | 2.419 | 3.008 | 2.406 |  | 4.648* | 3.063 | 3.100 | 4.090* | 3.105 |
| (1.642) | (1.544) | (1.925) | (1.501) |  | (3.557) | (1.976) | (2.004) | (2.660) | (2.049) |
| *Alternative Variables* |  |  |  |  |  |  |  |  |  |  |
| GDP per capita (log) |  |  |  | 1.385 |  |  |  |  |  |  |
|  |  |  | (0.479) |  |  |  |  |  |  |
| Level of democracy |  |  |  | 1.000 |  |  |  |  |  |  |
|  |  |  | (0.021) |  |  |  |  |  |  |
| Constant | −8.222*** | −7.478*** | −8.167*** | −8.504*** | −6.549*** | −10.931*** | −8.377*** | −8.418*** | 8.656*** | −8.466*** |
| (1.547) | (1.414) | (0.837) | (1.498) | (0.974) | (1.812) | (1.534) | (1.549) | (1.240) | (1.580) |
| Variance of the constant | 0.428** | 0.441** | 0.409** | 0.420** | 0.505* | 0.706 | 0.411** | 0.413** | 0.641* | 0.439** |
| (0.117) | (0.119) | (0.113) | (0.116) | (0.137) | (0.166) | (0.114) | (0.114) | (0.135) | (0.121) |
| Observations | 9,963 | 9,963 | 9,963 | 9,963 | 9,963 | 9,963 | 9,963 | 9,963 | 15,706 | 8,099 |

*Note:* Exponentiated coefficients reported. Standard errors in parentheses. GDP = gross domestic product; INGO = international nongovernmental organization.

*** *p* < .001. ** *p* < .01. * *p* < .05.

**Table A7.** Robustness Checks: Global Variant (Odds Ratios)

| Variable | Without Mobility | Without KOF | Without INGOs | GDP & Polity | Without Regions | Without Disciplines | Without Students *N* | Without Business | Larger Sample | Without the United States |
| --- | --- | --- | --- | --- | --- | --- | --- | --- | --- | --- |
| *Economic Factors* |  |  |  |  |  |  |  |  |  |  |
| International student mobility rate (log) |  | 0.708 | 0.546* | 0.646 | 0.882 | 0.625 | 0.550* | 0.544* |  | 0.545* |
|  | (0.169) | (0.148) | (0.175) | (0.244) | (0.179) | (0.149) | (0.147) |  | (0.148) |
| KOF Globalization Index | 1.008 |  | 1.021 |  | 0.987 | 1.029* | 1.021 | 1.021 | 1.004 | 1.021 |
| (0.010) |  | (0.011) |  | (0.011) | (0.012) | (0.011) | (0.011) | (0.006) | (0.011) |
| Business school | 0.281* | 0.285* | 0.284* | 0.285* | 0.287* | 0.219** | 0.287* |  | 0.330* | 0.261* |
| (0.152) | (0.154) | (0.153) | (0.154) | (0.155) | (0.113) | (0.155) |  | (0.144) | (0.141) |
| *Organizational Receptiveness* |  |  |  |  |  |  |  |  |  |  |
| International office | 1.334** | 1.339** | 1.338** | 1.339** | 1.327** | 1.755*** | 1.326** | 1.334** | 1.329*** | 1.206 |
|  | (0.122) | (0.123) | (0.123) | (0.123) | (0.122) | (0.153) | (0.121) | (0.122) | (0.114) | (0.128) |
| *N* of social sciences programs (log) | 10.047*** | 10.235*** | 10.139*** | 10.176*** | 10.451*** |  | 9.751*** | 9.536*** | 9.805*** | 11.478*** |
| (1.608) | (1.640) | (1.624) | (1.629) | (1.676) |  | (1.536) | (1.507) | (1.345) | (1.990) |
| *N* of science programs (log) | 2.119*** | 2.111*** | 2.118*** | 2.103*** | 2.102*** |  | 2.057*** | 2.236*** | 2.198*** | 1.947*** |
| (0.237) | (0.237) | (0.237) | (0.236) | (0.236) |  | (0.226) | (0.247) | (0.213) | (0.228) |
| *N* of humanities programs (log) | 1.106 | 1.104 | 1.106 | 1.099 | 1.093 |  | 1.097 | 1.140 | 1.093 | 1.060 |
| (0.132) | (0.132) | (0.132) | (0.131) | (0.130) |  | (0.131) | (0.136) | (0.116) | (0.135) |
| *Structural Embeddedness* |  |  |  |  |  |  |  |  |  |  |
| University association membership | 1.307* | 1.314** | 1.314** | 1.312** | 1.340** | 2.152*** | 1.304* | 1.329** | 1.273** | 1.324* |
| (0.137) | (0.138) | (0.138) | (0.138) | (0.141) | (0.212) | (0.136) | (0.139) | (0.117) | (0.144) |
| INGO memberships (log) | 1.352 | 1.358 |  |  | 0.842 | 1.635 | 1.314 | 1.331 | 1.164 | 1.375 |
| (0.596) | (0.599) |  |  | (0.350) | (0.744) | (0.566) | (0.572) | (0.368) | (0.589) |
| *University-Level Controls* |  |  |  |  |  |  |  |  |  |  |
| *N* of students (log) | 0.910 | 0.908 | 0.909 | 0.913 | 0.902 | 1.823*** |  | 0.911 |  | 0.847* |
| (0.068) | (0.068) | (0.068) | (0.068) | (0.067) | (0.116) |  | (0.068) |  | (0.070) |
| Public institution | 2.360*** | 2.348*** | 2.355*** | 2.358*** | 2.354*** | 2.713*** | 2.312*** | 2.303*** | 2.149*** | 2.321*** |
| (0.217) | (0.216) | (0.216) | (0.217) | (0.217) | (0.233) | (0.210) | (0.210) | (0.171) | (0.259) |
| Age (log) | 1.587*** | 1.590*** | 1.596*** | 1.590*** | 1.583*** | 2.461*** | 1.580*** | 1.586*** | 1.497*** | 1.691*** |
| (0.204) | (0.204) | (0.205) | (0.204) | (0.204) | (0.285) | (0.202) | (0.204) | (0.171) | (0.230) |
| *Regional Controls (ref.: Western Europe)* |  |  |  |  |  |  |  |  |  |  |
| North America | 1.550 | 1.341 | 1.634 | 1.268 |  | 5.521* | 1.707 | 1.686 | 1.232 | 2.027 |
| (0.993) | (0.851) | (1.018) | (0.782) |  | (3.752) | (1.059) | (1.044) | (0.775) | (1.715) |
| Sub-Saharan Africa | 7.298*** | 4.426** | 5.996*** | 5.449** |  | 14.886*** | 7.587*** | 7.396*** | 4.548*** | 7.256*** |
| (4.396) | (2.347) | (2.877) | (3.461) |  | (9.323) | (4.482) | (4.357) | (2.082) | (4.260) |
| Asia | 1.370 | 0.775 | 0.818 | 0.907 |  | 2.199 | 0.983 | 0.988 | 1.035 | 0.973 |
| (0.685) | (0.401) | (0.360) | (0.435) |  | (1.203) | (0.506) | (0.508) | (0.410) | (0.499) |
| Eastern Europe | 0.399* | 0.338** | 0.338** | 0.373* |  | 0.505 | 0.372* | 0.369* | 0.371** | 0.379* |
| (0.158) | (0.134) | (0.122) | (0.155) |  | (0.208) | (0.145) | (0.143) | (0.136) | (0.146) |
| Middle East and North Africa | 1.292 | 0.866 | 1.109 | 1.236 |  | 2.154 | 1.276 | 1.284 | 0.754 | 1.330 |
| (0.682) | (0.418) | (0.510) | (0.646) |  | (1.179) | (0.659) | (0.663) | (0.326) | (0.684) |
| Latin America | 1.866 | 0.966 | 1.167 | 0.944 |  | 2.552 | 1.299 | 1.319 | 1.095 | 1.279 |
| (0.985) | (0.510) | (0.590) | (0.465) |  | (1.447) | (0.699) | (0.709) | (0.445) | (0.687) |
| Australasia | 1.059 | 1.070 | 1.433 | 1.030 |  | 2.321 | 1.483 | 1.529 | 1.524 | 1.581 |
| (0.784) | (0.791) | (1.055) | (0.739) |  | (1.830) | (1.095) | (1.127) | (1.004) | (1.162) |
| *Alternative Variables* |  |  |  |  |  |  |  |  |  |  |
| GDP per capita (log) |  |  |  | 1.248 |  |  |  |  |  |  |
|  |  |  | (0.480) |  |  |  |  |  |  |
| Level of democracy |  |  |  | 1.034 |  |  |  |  |  |  |
|  |  |  | (0.026) |  |  |  |  |  |  |
| Constant | −8.394*** | −7.473*** | −7.844*** | −7.661*** | −5.290*** | −11.024*** | −9.069*** | −8.856*** | −7.679*** | −8.716*** |
| (1.770) | (1.614) | (0.892) | (1.673) | (1.185) | (1.855) | (1.743) | (1.748) | (1.200) | (1.744) |
| Variance of the constant | 0.641 | 0.650 | 0.601* | 0.608 | 1.157 | 0.736 | 0.596* | 0.592* | 0.674 | 0.589* |
| (0.160) | (0.160) | (0.153) | (0.157) | (0.255) | (0.178) | (0.152) | (0.151) | (0.143) | (0.153) |
| Observations | 9,963 | 9,963 | 9,963 | 9,963 | 9,963 | 9,963 | 9,963 | 9,963 | 15,706 | 8,099 |

*Note:* Exponentiated coefficients reported. Standard errors in parentheses. GDP = gross domestic product; INGO = international nongovernmental organization.

*** *p* < .001. ** *p* < .01. * *p* < .05.
